# Supplementary material for: A series of alkaline earth metal coordination polymers constructed from two newly designed imidazole-based dicarboxylate ligands containing pyridinylmethyl groups
Source: Royal Society of Chemistry journal article supplement (doi:10.1039/c7ce00568g), 2017-01-01
Supplement: c7ce00568g1.pdf [file c7ce00568g1.pdf]

# A series of alkaline earth metal coordination polymers constructed from two newly designed imidazole-based dicarboxylate ligands containing pyridinylmethyl group

Song-Liang Cai,<sup>\*a</sup> Zi-Hao He<sup>a</sup>, Wan-Hua Wu<sup>a</sup>, Fang-Xiu Liu<sup>a</sup>, Xiao-Ling Huang,<sup>a</sup> Sheng-Run Zheng,<sup>\*a</sup> Jun Fan,<sup>ab</sup> and Wei-Guang Zhang<sup>\*ab</sup>

<sup>a</sup>School of Chemistry and Environment, South China Normal University, Guangzhou, 510006, P. R. China. E-mail: [songliangcai@m.scnu.edu.cn](mailto:songliangcai@m.scnu.edu.cn); [zhengsr@scnu.edu.cn](mailto:zhengsr@scnu.edu.cn); [wgzhang@scnu.edu.cn](mailto:wgzhang@scnu.edu.cn); Fax: +86-20-39347768

<sup>b</sup>Zhongshan Polytechnic, Zhongshan, 528403, P. R. China

<sup>c</sup>Guangdong YanJie Pharmatech Co. Ltd., Guangzhou, 510663, P. R. China

## Supporting information

Table S1 Selected bond lengths [Å] and angles[°] for the compounds 1-7.<sup>a</sup>

| Compound 1          |            |                     |            |
|---------------------|------------|---------------------|------------|
| Ba(1)-O(2)#1        | 2.655(4)   | Ba(1)-O(4)#3        | 2.830(4)   |
| Ba(1)-O(3)#1        | 2.688(4)   | Ba(1)-O(2)          | 2.858(4)   |
| Ba(1)-O(1)#2        | 2.777(4)   | Ba(1)-O(3)#4        | 2.880(4)   |
| Ba(1)-O(1W)         | 2.810(4)   | Ba(1)-O(4)#4        | 2.942(4)   |
| Ba(1)-O(1)          | 2.818(4)   |                     |            |
| O(2)#1-Ba(1)-O(3)#1 | 65.33(12)  | O(1W)-Ba(1)-O(2)    | 106.48(12) |
| O(2)#1-Ba(1)-O(1)#2 | 154.92(11) | O(1)-Ba(1)-O(2)     | 45.93(11)  |
| O(3)#1-Ba(1)-O(1)#2 | 110.83(12) | O(4)#3-Ba(1)-O(2)   | 67.54(11)  |
| O(2)#1-Ba(1)-O(1W)  | 91.69(12)  | O(2)#1-Ba(1)-O(3)#4 | 118.69(12) |
| O(3)#1-Ba(1)-O(1W)  | 79.95(13)  | O(3)#1-Ba(1)-O(3)#4 | 71.06(13)  |
| O(1)#2-Ba(1)-O(1W)  | 63.53(12)  | O(1)#2-Ba(1)-O(3)#4 | 80.23(11)  |
| O(2)#1-Ba(1)-O(1)   | 74.99(11)  | O(1W)-Ba(1)-O(3)#4  | 120.85(12) |
| O(3)#1-Ba(1)-O(1)   | 129.69(12) | O(1)-Ba(1)-O(3)#4   | 105.32(12) |
| O(1)#2-Ba(1)-O(1)   | 118.01(9)  | O(4)#3-Ba(1)-O(3)#4 | 171.58(11) |
| O(1W)-Ba(1)-O(1)    | 132.29(11) | O(2)-Ba(1)-O(3)#4   | 104.68(11) |
| O(2)#1-Ba(1)-O(4)#3 | 64.03(11)  | O(2)#1-Ba(1)-O(4)#4 | 138.80(12) |

|                     |            |                     |            |
|---------------------|------------|---------------------|------------|
| O(3)#1-Ba(1)-O(4)#3 | 116.39(11) | O(3)#1-Ba(1)-O(4)#4 | 115.54(11) |
| O(1)#2-Ba(1)-O(4)#3 | 99.78(11)  | O(1)#2-Ba(1)-O(4)#4 | 66.12(11)  |
| O(1W)-Ba(1)-O(4)#3  | 65.88(12)  | O(1W)-Ba(1)-O(4)#4  | 129.51(12) |
| O(1)-Ba(1)-O(4)#3   | 67.14(11)  | O(1)-Ba(1)-O(4)#4   | 76.19(11)  |
| O(2)#1-Ba(1)-O(2)   | 114.10(10) | O(4)#3-Ba(1)-O(4)#4 | 127.78(7)  |
| O(3)#1-Ba(1)-O(2)   | 173.56(12) | O(2)-Ba(1)-O(4)#4   | 60.25(10)  |
| O(1)#2-Ba(1)-O(2)   | 72.53(11)  | O(3)#4-Ba(1)-O(4)#4 | 44.50(10)  |

---

**Compound 2**

|                     |           |                     |            |
|---------------------|-----------|---------------------|------------|
| O(1)-Sr(1)#2        | 2.655(3)  | O(3)-Sr(1)#1        | 2.785(3)   |
| O(1)-Sr(1)          | 2.682(3)  | O(4)-Sr(1)#4        | 2.742(3)   |
| O(2)-Sr(1)#3        | 2.530(3)  | O(4)-Sr(1)#1        | 2.807(3)   |
| O(2)-Sr(1)          | 2.725(3)  | O(1W)-Sr(1)         | 2.665(3)   |
| O(3)-Sr(1)#3        | 2.567(3)  |                     |            |
| O(2)#2-Sr(1)-O(3)#2 | 69.11(9)  | O(1)#3-Sr(1)-O(4)#4 | 102.53(9)  |
| O(2)#2-Sr(1)-O(1)#3 | 157.88(9) | O(1W)-Sr(1)-O(4)#4  | 67.05(9)   |
| O(3)#2-Sr(1)-O(1)#3 | 107.82(9) | O(1)-Sr(1)-O(4)#4   | 67.37(9)   |
| O(2)#2-Sr(1)-O(1W)  | 91.84(9)  | O(2)-Sr(1)-O(4)#4   | 69.97(9)   |
| O(3)#2-Sr(1)-O(1W)  | 78.00(10) | O(2)#2-Sr(1)-O(3)#5 | 115.70(9)  |
| O(1)#3-Sr(1)-O(1W)  | 66.37(9)  | O(3)#2-Sr(1)-O(3)#5 | 65.10(11)  |
| O(2)#2-Sr(1)-O(1)   | 73.12(9)  | O(1)#3-Sr(1)-O(3)#5 | 80.16(9)   |
| O(3)#2-Sr(1)-O(1)   | 130.79(9) | O(1W)-Sr(1)-O(3)#5  | 118.69(9)  |
| O(1)#3-Sr(1)-O(1)   | 118.78(7) | O(1)-Sr(1)-O(3)#5   | 106.87(9)  |
| O(1W)-Sr(1)-O(1)    | 133.99(9) | O(2)-Sr(1)-O(3)#5   | 106.56(8)  |
| O(2)#2-Sr(1)-O(2)   | 115.65(7) | O(4)#4-Sr(1)-O(3)#5 | 174.24(9)  |
| O(3)#2-Sr(1)-O(2)   | 171.59(9) | O(2)#2-Sr(1)-O(4)#5 | 135.24(10) |
| O(1)#3-Sr(1)-O(2)   | 70.54(8)  | O(3)#2-Sr(1)-O(4)#5 | 111.57(9)  |
| O(1W)-Sr(1)-O(2)    | 108.13(9) | O(1)#3-Sr(1)-O(4)#5 | 66.79(9)   |
| O(1)-Sr(1)-O(2)     | 48.81(8)  | O(1W)-Sr(1)-O(4)#5  | 132.82(9)  |
| O(2)#2-Sr(1)-O(4)#4 | 63.22(9)  | O(1)-Sr(1)-O(4)#5   | 75.74(9)   |
| O(3)#2-Sr(1)-O(4)#4 | 118.24(9) | O(2)-Sr(1)-O(4)#5   | 60.07(8)   |

---

**Compound 3**

|                     |           |                    |           |
|---------------------|-----------|--------------------|-----------|
| Ca(1)-O(2W)         | 2.284(11) | Ca(2)-O(4)#1       | 2.316(9)  |
| Ca(1)-O(8)#2        | 2.329(9)  | Ca(2)-O(7)         | 2.327(8)  |
| Ca(1)-O(3)          | 2.332(8)  | Ca(2)-O(1W)        | 2.331(11) |
| Ca(1)-O(1)#3        | 2.434(8)  | Ca(2)-O(6)         | 2.411(8)  |
| Ca(1)-O(2)          | 2.486(7)  | Ca(2)-O(5)#3       | 2.442(7)  |
| Ca(1)-O(6)          | 2.506(8)  | Ca(2)-O(2)#3       | 2.489(7)  |
| Ca(1)-O(5)          | 2.524(8)  | Ca(2)-O(1)#3       | 2.537(8)  |
| O(2W)-Ca(1)-O(8)#2  | 160.9(3)  | O(4)#1-Ca(2)-O(7)  | 82.5(3)   |
| O(2W)-Ca(1)-O(3)    | 78.4(3)   | O(4)#1-Ca(2)-O(1W) | 160.4(3)  |
| O(8)#2-Ca(1)-O(3)   | 82.6(3)   | O(7)-Ca(2)-O(1W)   | 78.6(3)   |
| O(2W)-Ca(1)-O(1)#3  | 98.2(4)   | O(4)#1-Ca(2)-O(6)  | 95.4(3)   |
| O(8)#2-Ca(1)-O(1)#3 | 83.1(3)   | O(7)-Ca(2)-O(6)    | 81.0(3)   |

|                   |          |                     |          |
|-------------------|----------|---------------------|----------|
| O(3)-Ca(1)-O(1)#3 | 85.9(3)  | O(1W)-Ca(2)-O(6)    | 76.7(4)  |
| O(2W)-Ca(1)-O(2)  | 78.8(3)  | O(4)#1-Ca(2)-O(5)#3 | 84.5(3)  |
| O(8)#2-Ca(1)-O(2) | 95.0(3)  | O(7)-Ca(2)-O(5)#3   | 84.4(3)  |
| O(3)-Ca(1)-O(2)   | 79.3(3)  | O(1W)-Ca(2)-O(5)#3  | 98.7(4)  |
| O(1)#3-Ca(1)-O(2) | 165.2(3) | O(6)-Ca(2)-O(5)#3   | 165.3(3) |
| O(2W)-Ca(1)-O(6)  | 88.7(3)  | O(4)#1-Ca(2)-O(2)#3 | 111.2(3) |
| O(8)#2-Ca(1)-O(6) | 109.7(3) | O(7)-Ca(2)-O(2)#3   | 151.6(3) |
| O(3)-Ca(1)-O(6)   | 152.7(3) | O(1W)-Ca(2)-O(2)#3  | 88.1(3)  |
| O(1)#3-Ca(1)-O(6) | 72.1(3)  | O(6)-Ca(2)-O(2)#3   | 120.4(3) |
| O(2)-Ca(1)-O(6)   | 122.0(2) | O(5)#3-Ca(2)-O(2)#3 | 72.9(2)  |
| O(2W)-Ca(1)-O(5)  | 90.3(3)  | O(4)#1-Ca(2)-O(1)#3 | 107.4(3) |
| O(8)#2-Ca(1)-O(5) | 105.1(3) | O(7)-Ca(2)-O(1)#3   | 151.8(3) |
| O(3)-Ca(1)-O(5)   | 150.3(3) | O(1W)-Ca(2)-O(1)#3  | 87.5(3)  |
| O(1)#3-Ca(1)-O(5) | 123.2(3) | O(6)-Ca(2)-O(1)#3   | 72.0(3)  |
| O(2)-Ca(1)-O(5)   | 71.6(2)  | O(5)#3-Ca(2)-O(1)#3 | 122.2(3) |
| O(6)-Ca(1)-O(5)   | 51.9(2)  | O(2)#3-Ca(2)-O(1)#3 | 49.8(2)  |

---

**Compound 4**

|                     |            |                     |            |
|---------------------|------------|---------------------|------------|
| Ca(1)-O(5)          | 2.252(4)   | Ca(2)-O(6)          | 2.276(4)   |
| Ca(1)-O(3)#2        | 2.254(3)   | Ca(2)-O(7)          | 2.309(4)   |
| Ca(1)-O(2)#2        | 2.255(4)   | Ca(2)-O(8)#4        | 2.418(4)   |
| Ca(1)-O(4)#3        | 2.333(4)   | Ca(2)-N(5)#4        | 2.546(4)   |
| Ca(1)-O(2W)         | 2.352(4)   | Ca(2)-N(6)#1        | 2.549(5)   |
| Ca(1)-N(1)#3        | 2.436(4)   | Ca(2)-O(1W)         | 2.703(6)   |
| Ca(2)-O(1)          | 2.270(4)   |                     |            |
| O(5)-Ca(1)-O(3)#2   | 105.63(14) | O(1)-Ca(2)-O(8)#4   | 74.30(13)  |
| O(5)-Ca(1)-O(2)#2   | 93.49(17)  | O(6)-Ca(2)-O(8)#4   | 113.92(13) |
| O(3)#2-Ca(1)-O(2)#2 | 83.52(14)  | O(7)-Ca(2)-O(8)#4   | 148.70(13) |
| O(5)-Ca(1)-O(4)#3   | 85.80(13)  | O(1)-Ca(2)-N(5)#4   | 135.95(13) |
| O(3)#2-Ca(1)-O(4)#3 | 168.35(14) | O(6)-Ca(2)-N(5)#4   | 94.67(14)  |
| O(2)#2-Ca(1)-O(4)#3 | 93.70(14)  | O(7)-Ca(2)-N(5)#4   | 87.38(14)  |
| O(5)-Ca(1)-O(2W)    | 95.24(17)  | O(8)#4-Ca(2)-N(5)#4 | 64.02(12)  |
| O(3)#2-Ca(1)-O(2W)  | 93.92(14)  | O(1)-Ca(2)-N(6)#1   | 88.79(15)  |
| O(2)#2-Ca(1)-O(2W)  | 171.26(17) | O(6)-Ca(2)-N(6)#1   | 161.69(15) |
| O(4)#3-Ca(1)-O(2W)  | 87.13(15)  | O(7)-Ca(2)-N(6)#1   | 89.81(14)  |
| O(5)-Ca(1)-N(1)#3   | 153.48(14) | O(8)#4-Ca(2)-N(6)#1 | 83.03(15)  |
| O(3)#2-Ca(1)-N(1)#3 | 100.79(14) | N(5)#4-Ca(2)-N(6)#1 | 99.31(14)  |
| O(2)#2-Ca(1)-N(1)#3 | 87.09(16)  | O(1)-Ca(2)-O(1W)    | 67.26(15)  |
| O(4)#3-Ca(1)-N(1)#3 | 67.71(13)  | O(6)-Ca(2)-O(1W)    | 85.91(17)  |
| O(2W)-Ca(1)-N(1)#3  | 85.18(15)  | O(7)-Ca(2)-O(1W)    | 69.86(15)  |
| O(1)-Ca(2)-O(6)     | 89.35(14)  | O(8)#4-Ca(2)-O(1W)  | 136.43(15) |
| O(1)-Ca(2)-O(7)     | 136.19(14) | N(5)#4-Ca(2)-O(1W)  | 156.74(14) |
| O(6)-Ca(2)-O(7)     | 79.02(13)  | N(6)#1-Ca(2)-O(1W)  | 76.58(17)  |

---

**Compound 5**

|                     |            |                     |            |
|---------------------|------------|---------------------|------------|
| Ba(1)-O(3)#1        | 2.662(4)   | Ba(1)-O(1)          | 2.878(4)   |
| Ba(1)-O(2)#1        | 2.699(3)   | Ba(1)-O(2)#4        | 2.900(4)   |
| Ba(1)-O(4)#2        | 2.776(3)   | Ba(1)-O(1W)         | 2.905(4)   |
| Ba(1)-O(4)#3        | 2.811(3)   | Ba(1)-O(1)#4        | 2.961(3)   |
| Ba(1)-O(3)#3        | 2.860(3)   |                     |            |
| O(3)#1-Ba(1)-O(2)#1 | 65.63(10)  | O(4)#3-Ba(1)-O(2)#4 | 103.41(10) |
| O(3)#1-Ba(1)-O(4)#2 | 158.61(10) | O(3)#3-Ba(1)-O(2)#4 | 103.76(10) |
| O(2)#1-Ba(1)-O(4)#2 | 116.03(10) | O(1)-Ba(1)-O(2)#4   | 168.41(10) |
| O(3)#1-Ba(1)-O(4)#3 | 72.62(9)   | O(3)#1-Ba(1)-O(1W)  | 95.85(10)  |
| O(2)#1-Ba(1)-O(4)#3 | 125.63(10) | O(2)#1-Ba(1)-O(1W)  | 87.23(12)  |
| O(4)#2-Ba(1)-O(4)#3 | 115.60(8)  | O(4)#2-Ba(1)-O(1W)  | 63.57(10)  |
| O(3)#1-Ba(1)-O(3)#3 | 112.41(9)  | O(4)#3-Ba(1)-O(1W)  | 131.20(11) |
| O(2)#1-Ba(1)-O(3)#3 | 168.52(10) | O(3)#3-Ba(1)-O(1W)  | 104.25(11) |
| O(4)#2-Ba(1)-O(3)#3 | 70.24(10)  | O(1)-Ba(1)-O(1W)    | 67.36(11)  |
| O(4)#3-Ba(1)-O(3)#3 | 45.89(10)  | O(2)#4-Ba(1)-O(1W)  | 123.21(11) |
| O(3)#1-Ba(1)-O(1)   | 63.13(10)  | O(3)#1-Ba(1)-O(1)#4 | 136.11(10) |
| O(2)#1-Ba(1)-O(1)   | 118.75(10) | O(2)#1-Ba(1)-O(1)#4 | 112.96(10) |
| O(4)#2-Ba(1)-O(1)   | 101.18(10) | O(4)#2-Ba(1)-O(1)#4 | 64.51(10)  |
| O(4)#3-Ba(1)-O(1)   | 65.20(10)  | O(4)#3-Ba(1)-O(1)#4 | 75.78(10)  |
| O(3)#3-Ba(1)-O(1)   | 67.10(10)  | O(3)#3-Ba(1)-O(1)#4 | 59.86(10)  |
| O(3)#1-Ba(1)-O(2)#4 | 116.96(10) | O(1)-Ba(1)-O(1)#4   | 126.87(6)  |
| O(2)#1-Ba(1)-O(2)#4 | 68.99(11)  | O(2)#4-Ba(1)-O(1)#4 | 44.08(9)   |
| O(4)#2-Ba(1)-O(2)#4 | 81.44(10)  | O(1W)-Ba(1)-O(1)#4  | 127.99(10) |

#### Compound 6

|                    |           |                     |            |
|--------------------|-----------|---------------------|------------|
| Mg(1)-O(4)#1       | 2.057(4)  | Mg(3)-O(5)          | 2.095(4)   |
| Mg(1)-O(2W)        | 2.062(6)  | Mg(3)-N(4)          | 2.165(5)   |
| Mg(1)-O(8)         | 2.102(4)  | Mg(3)-N(4)#2        | 2.165(5)   |
| Mg(1)-O(1W)        | 2.128(5)  | Mg(3)-N(4)#3        | 2.165(5)   |
| Mg(1)-N(5)         | 2.132(6)  | Mg(4)-O(7W)         | 2.052(7)   |
| Mg(1)-N(2)#1       | 2.217(6)  | Mg(4)-O(4W)         | 2.058(6)   |
| Mg(2)-O(3)         | 1.989(5)  | Mg(4)-O(1)          | 2.071(5)   |
| Mg(2)-O(6)         | 2.001(5)  | Mg(4)-O(6W)         | 2.084(5)   |
| Mg(2)-O(2)         | 2.055(4)  | Mg(4)-O(5W)         | 2.099(6)   |
| Mg(2)-O(3W)        | 2.086(4)  | Mg(4)-N(1)          | 2.141(6)   |
| Mg(2)-O(7)         | 2.109(4)  | N(2)-Mg(1)#4        | 2.217(6)   |
| Mg(2)-N(3)#1       | 2.185(7)  | N(3)-Mg(2)#4        | 2.186(6)   |
| Mg(3)-O(5)#2       | 2.095(4)  | O(4)-Mg(1)#4        | 2.058(4)   |
| Mg(3)-O(5)#3       | 2.095(4)  |                     |            |
| O(4)#1-Mg(1)-O(2W) | 93.66(19) | O(5)#2-Mg(3)-O(5)#3 | 88.51(16)  |
| O(4)#1-Mg(1)-O(8)  | 173.1(2)  | O(5)#2-Mg(3)-O(5)   | 88.51(17)  |
| O(2W)-Mg(1)-O(8)   | 92.9(2)   | O(5)#3-Mg(3)-O(5)   | 88.51(16)  |
| O(4)#1-Mg(1)-O(1W) | 88.41(18) | O(5)#2-Mg(3)-N(4)   | 93.67(15)  |
| O(2W)-Mg(1)-O(1W)  | 85.6(2)   | O(5)#3-Mg(3)-N(4)   | 165.34(17) |
| O(8)-Mg(1)-O(1W)   | 90.07(16) | O(5)-Mg(3)-N(4)     | 77.07(15)  |

|                     |            |                     |            |
|---------------------|------------|---------------------|------------|
| O(4)#1-Mg(1)-N(5)   | 97.31(18)  | O(5)#2-Mg(3)-N(4)#2 | 77.07(15)  |
| O(2W)-Mg(1)-N(5)    | 168.9(2)   | O(5)#3-Mg(3)-N(4)#2 | 93.68(15)  |
| O(8)-Mg(1)-N(5)     | 76.07(17)  | O(5)-Mg(3)-N(4)#2   | 165.34(17) |
| O(1W)-Mg(1)-N(5)    | 92.8(2)    | N(4)-Mg(3)-N(4)#2   | 100.94(17) |
| O(4)#1-Mg(1)-N(2)#1 | 77.53(19)  | O(5)#2-Mg(3)-N(4)#3 | 165.34(17) |
| O(2W)-Mg(1)-N(2)#1  | 87.71(18)  | O(5)#3-Mg(3)-N(4)#3 | 77.07(15)  |
| O(8)-Mg(1)-N(2)#1   | 104.78(17) | O(5)-Mg(3)-N(4)#3   | 93.68(15)  |
| O(1W)-Mg(1)-N(2)#1  | 164.0(2)   | N(4)-Mg(3)-N(4)#3   | 100.95(17) |
| N(5)-Mg(1)-N(2)#1   | 96.46(17)  | N(4)#2-Mg(3)-N(4)#3 | 100.94(17) |
| O(3)-Mg(2)-O(6)     | 177.03(17) | O(7W)-Mg(4)-O(4W)   | 88.6(3)    |
| O(3)-Mg(2)-O(2)     | 93.80(19)  | O(7W)-Mg(4)-O(1)    | 92.3(2)    |
| O(6)-Mg(2)-O(2)     | 87.9(2)    | O(4W)-Mg(4)-O(1)    | 92.5(2)    |
| O(3)-Mg(2)-O(3W)    | 90.1(2)    | O(7W)-Mg(4)-O(6W)   | 84.9(2)    |
| O(6)-Mg(2)-O(3W)    | 87.4(2)    | O(4W)-Mg(4)-O(6W)   | 169.9(3)   |
| O(2)-Mg(2)-O(3W)    | 91.6(2)    | O(1)-Mg(4)-O(6W)    | 95.5(2)    |
| O(3)-Mg(2)-O(7)     | 89.10(19)  | O(7W)-Mg(4)-O(5W)   | 95.1(3)    |
| O(6)-Mg(2)-O(7)     | 89.33(19)  | O(4W)-Mg(4)-O(5W)   | 84.2(3)    |
| O(2)-Mg(2)-O(7)     | 176.17(18) | O(1)-Mg(4)-O(5W)    | 171.9(3)   |
| O(3W)-Mg(2)-O(7)    | 90.9(2)    | O(6W)-Mg(4)-O(5W)   | 88.6(2)    |
| O(3)-Mg(2)-N(3)#1   | 90.03(18)  | O(7W)-Mg(4)-N(1)    | 167.4(2)   |
| O(6)-Mg(2)-N(3)#1   | 92.42(17)  | O(4W)-Mg(4)-N(1)    | 99.8(3)    |
| O(2)-Mg(2)-N(3)#1   | 89.83(18)  | O(1)-Mg(4)-N(1)     | 78.0(2)    |
| O(3W)-Mg(2)-N(3)#1  | 178.6(2)   | O(6W)-Mg(4)-N(1)    | 87.9(2)    |
| O(7)-Mg(2)-N(3)#1   | 87.66(17)  | O(5W)-Mg(4)-N(1)    | 95.1(3)    |

---

Compound 7

---

|                     |            |                     |            |
|---------------------|------------|---------------------|------------|
| Sr(1)-O(4)#1        | 2.515(5)   | Sr(1)-O(1)          | 2.625(5)   |
| Sr(1)-O(4)#2        | 2.515(5)   | Sr(1)-O(1)#3        | 2.625(5)   |
| Sr(1)-O(5)          | 2.539(7)   | Sr(1)-N(1)          | 2.779(5)   |
| Sr(1)-O(5)#3        | 2.539(7)   | Sr(1)-N(1)#3        | 2.779(5)   |
| O(4)#1-Sr(1)-O(4)#2 | 133.2(3)   | O(1)-Sr(1)-O(1)#3   | 125.9(2)   |
| O(4)#1-Sr(1)-O(5)   | 71.5(3)    | O(4)#1-Sr(1)-N(1)   | 133.18(17) |
| O(4)#2-Sr(1)-O(5)   | 76.2(2)    | O(4)#2-Sr(1)-N(1)   | 86.4(2)    |
| O(4)#1-Sr(1)-O(5)#3 | 76.2(2)    | O(5)-Sr(1)-N(1)     | 103.4(3)   |
| O(4)#2-Sr(1)-O(5)#3 | 71.5(3)    | O(5)#3-Sr(1)-N(1)   | 149.9(2)   |
| O(5)-Sr(1)-O(5)#3   | 91.2(4)    | O(1)-Sr(1)-N(1)     | 61.42(16)  |
| O(4)#1-Sr(1)-O(1)   | 72.30(17)  | O(1)#3-Sr(1)-N(1)   | 76.46(17)  |
| O(4)#2-Sr(1)-O(1)   | 131.69(18) | O(4)#1-Sr(1)-N(1)#3 | 86.4(2)    |
| O(5)-Sr(1)-O(1)     | 77.5(2)    | O(4)#2-Sr(1)-N(1)#3 | 133.18(17) |
| O(5)#3-Sr(1)-O(1)   | 148.5(2)   | O(5)-Sr(1)-N(1)#3   | 149.9(2)   |
| O(4)#1-Sr(1)-O(1)#3 | 131.69(18) | O(5)#3-Sr(1)-N(1)#3 | 103.4(3)   |
| O(4)#2-Sr(1)-O(1)#3 | 72.30(17)  | O(1)-Sr(1)-N(1)#3   | 76.46(17)  |
| O(5)-Sr(1)-O(1)#3   | 148.5(2)   | O(1)#3-Sr(1)-N(1)#3 | 61.42(16)  |
| O(5)#3-Sr(1)-O(1)#3 | 77.5(2)    | N(1)-Sr(1)-N(1)#3   | 76.8(3)    |

<sup>a</sup>Symmetry transformations used to generate equivalent atoms: #1  $-x+1,y+1/2,-z-1/2$  #2  $-x+1,y-1/2,-z-1/2$  #3  $-x+1,-y+1,-z$  #4  $x,-y+1/2,z-1/2$  for compound **1**; #1  $x,-y+1/2,z-1/2$  #2  $-x+2,y+1/2,-z+3/2$  #3  $-x+2,y-1/2,-z+3/2$  #4  $-x+2,-y+1,-z+1$  #5  $x,-y+1/2,z+1/2$  for compound **2**; #1  $x+1/2,-y+3,z$  #2  $x-1/2,-y+3,z$  #3  $x,y+1,z$  for compound **3**; #1  $x-1,-y+1,z+1/2$  #2  $x+1,y,z$  #3  $x+1,-y,z-1/2$  #4  $x,-y+1,z+1/2$  for compound **4**; #1  $x,-y+1/2,z+1/2$  #2  $x,-y+3/2,z+1/2$  #3  $-x+1,-y+1,-z$  #4  $-x+1,y+1/2,-z+1/2$  for compound **5**; #1  $-x+y+5/3,y+1/3,z-1/6$  #2  $-y+1,x-y,z$  #3  $-x+y+1,-x+1,z$  #4  $-x+y+4/3,y-1/3,z+1/6$  for compound **6**; #1  $x-1/2,-y+3/2,-z+1/4$  #2  $-y+3/2,x-1/2,z-1/4$  #3  $y,x,-z$  for compound **7**.

Scheme S1: Synthetic Route of Ligand  $H_3pPyMIDC$ .

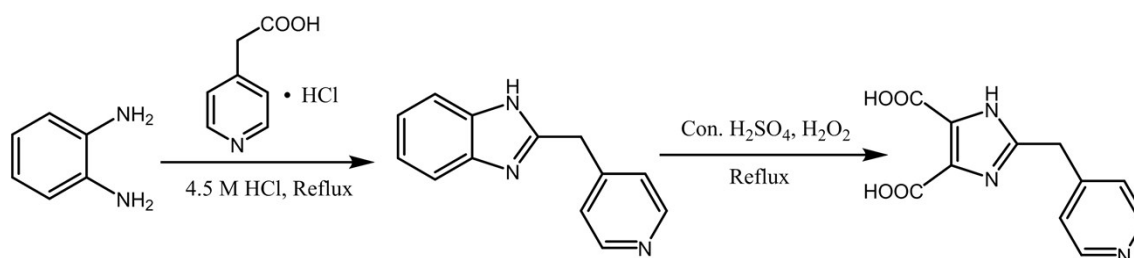

Scheme S2: Synthetic Route of Ligand  $H_3mPyMIDC$ .

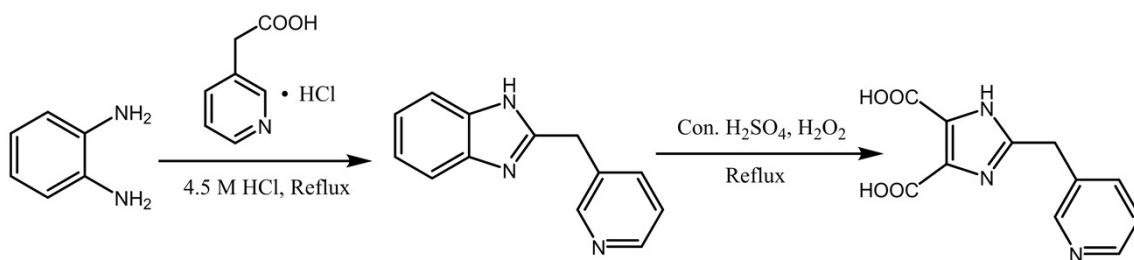

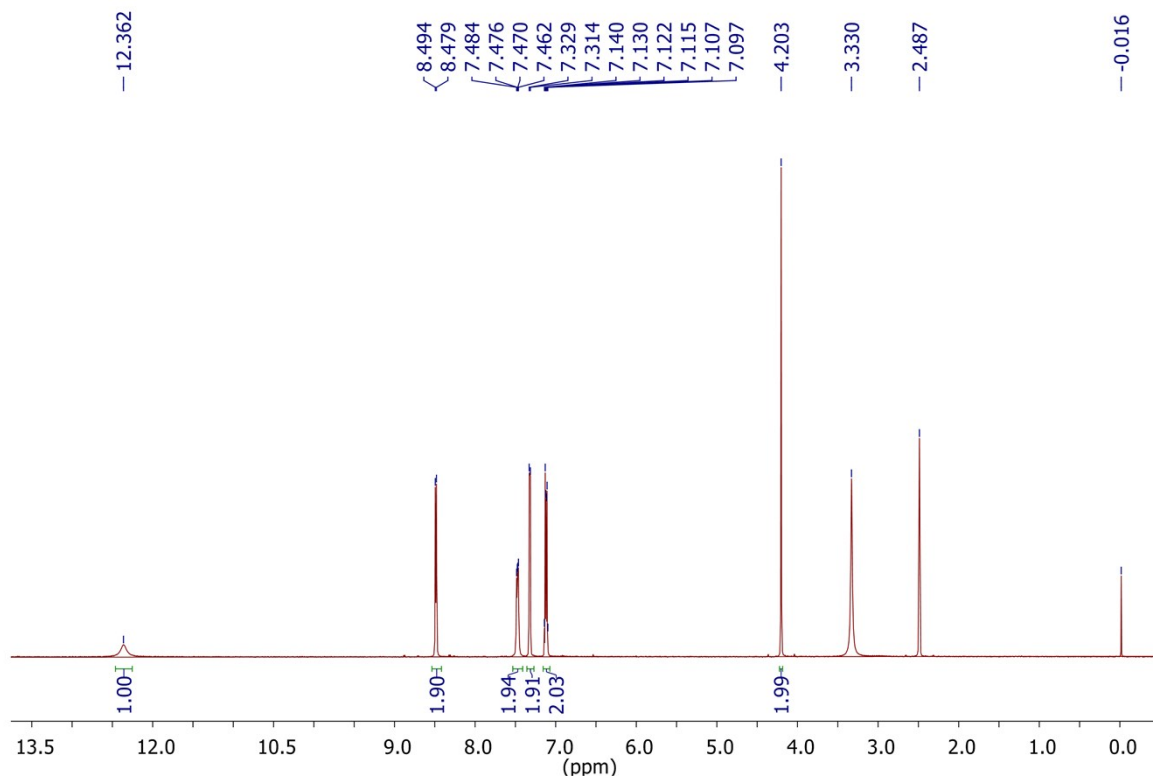

Figure S1.  $^1\text{H}$  NMR spectrum (DMSO- $d_6$ , 298 K, 400 MHz) of 2-(pyridin-4-ylmethyl)-1H-benzimidazole.

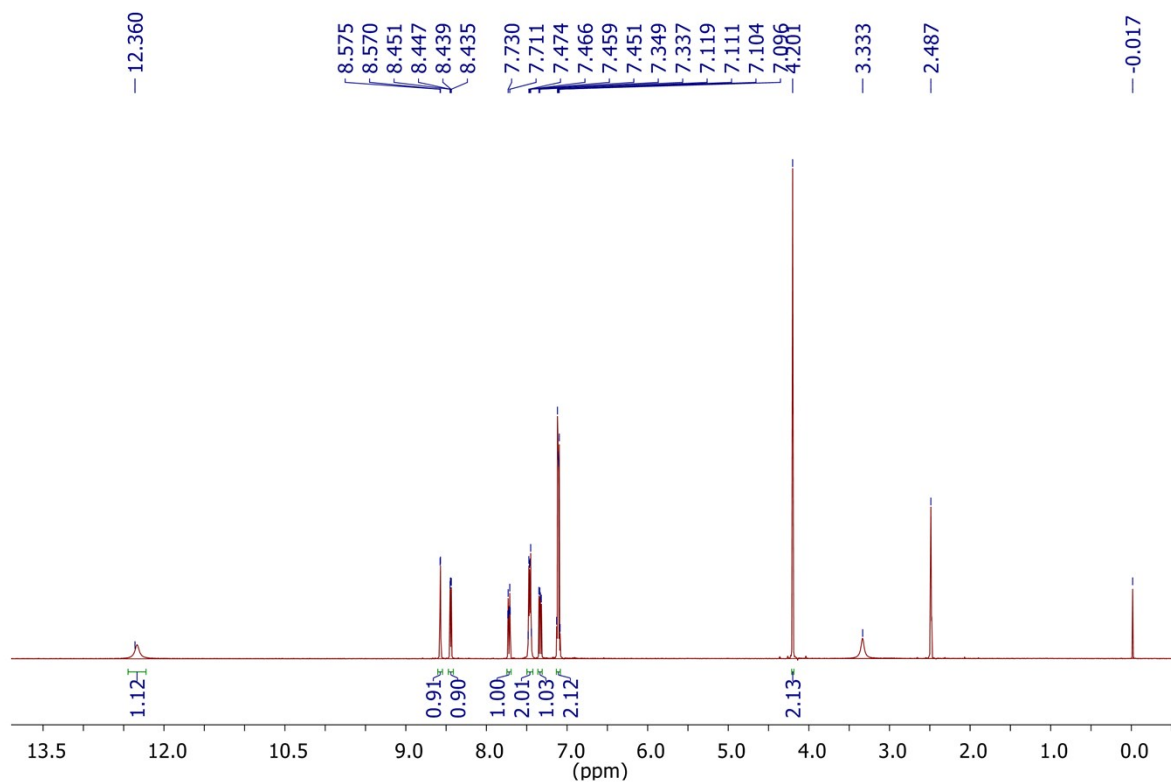

Figure S2.  $^1\text{H}$  NMR spectrum (DMSO- $d_6$ , 298 K, 400 MHz) of 2-(pyridin-3-ylmethyl)-1H-benzimidazole.

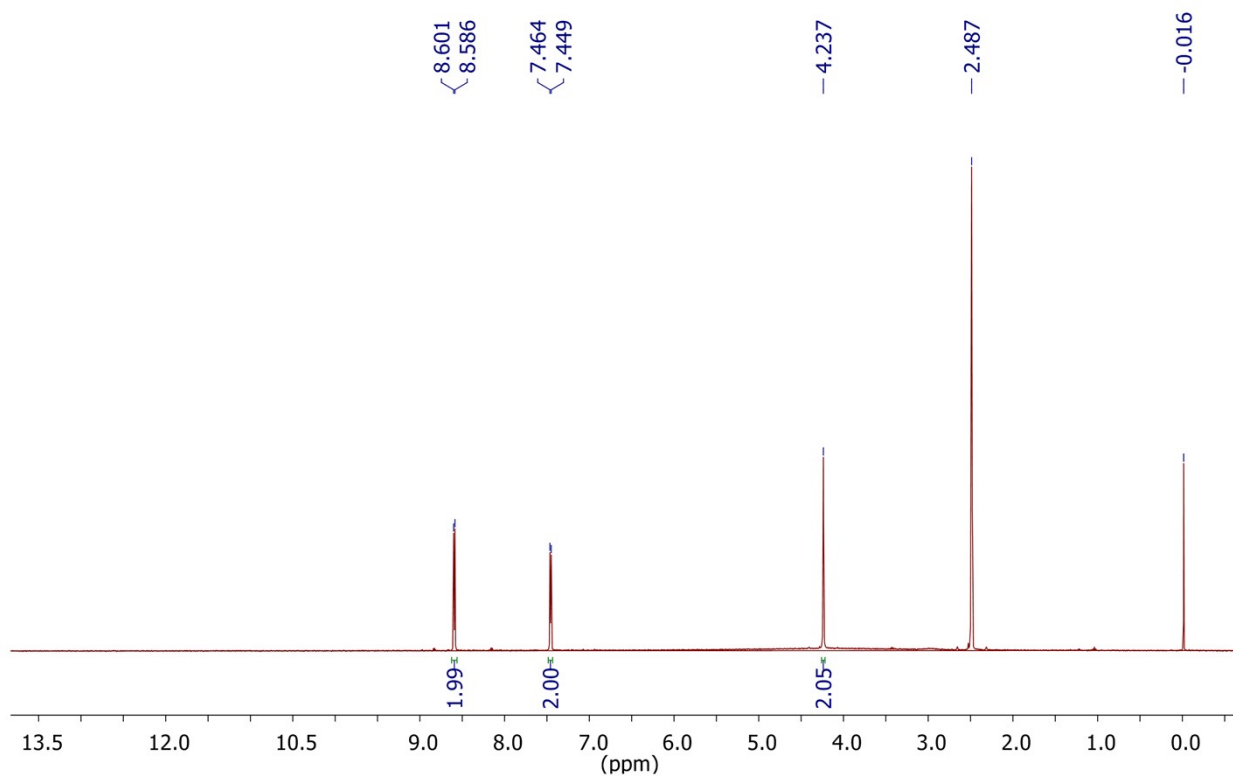

Figure S3.  $^1\text{H}$  NMR spectrum ( $\text{DMSO-}d_6$ , 298 K, 400 MHz) of the  $\text{H}_3\text{pPyMIDC}$  ligand

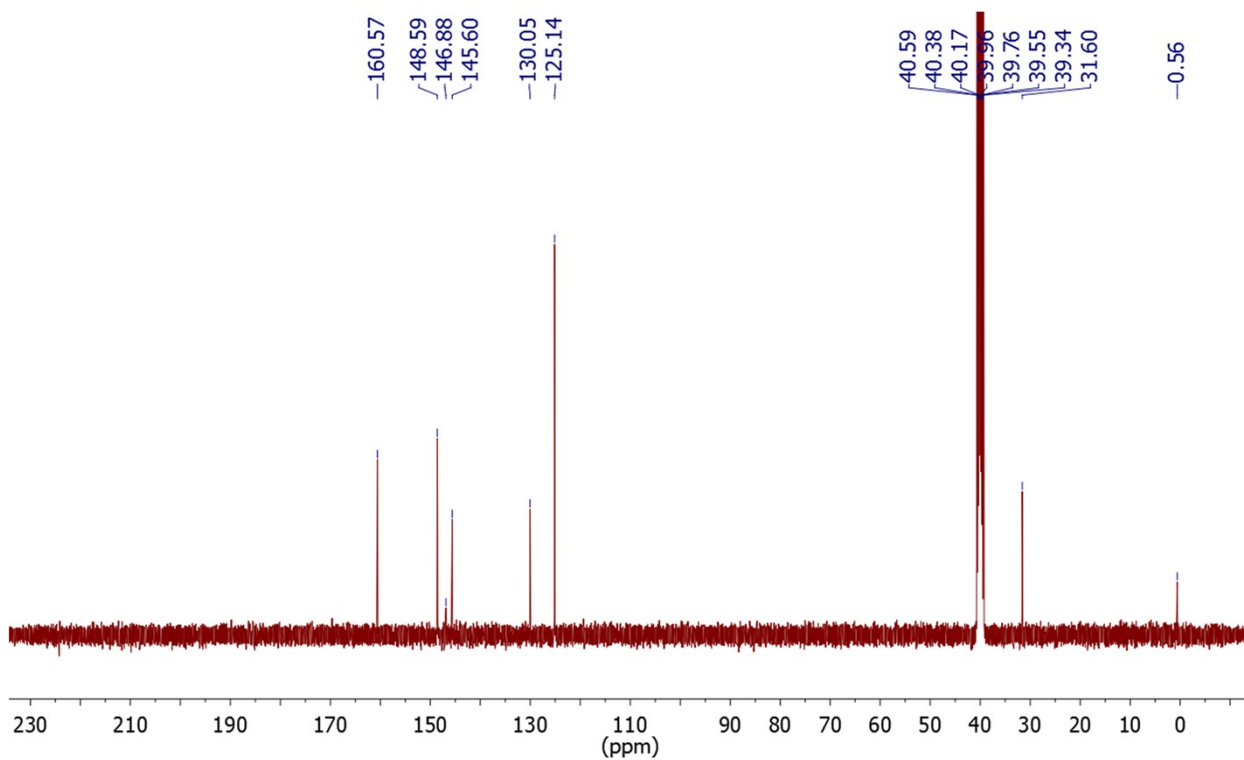

Figure S4.  $^{13}\text{C}$  NMR spectrum ( $\text{DMSO-}d_6$ , 298 K, 400 MHz) of the  $\text{H}_3\text{pPyMIDC}$  ligand



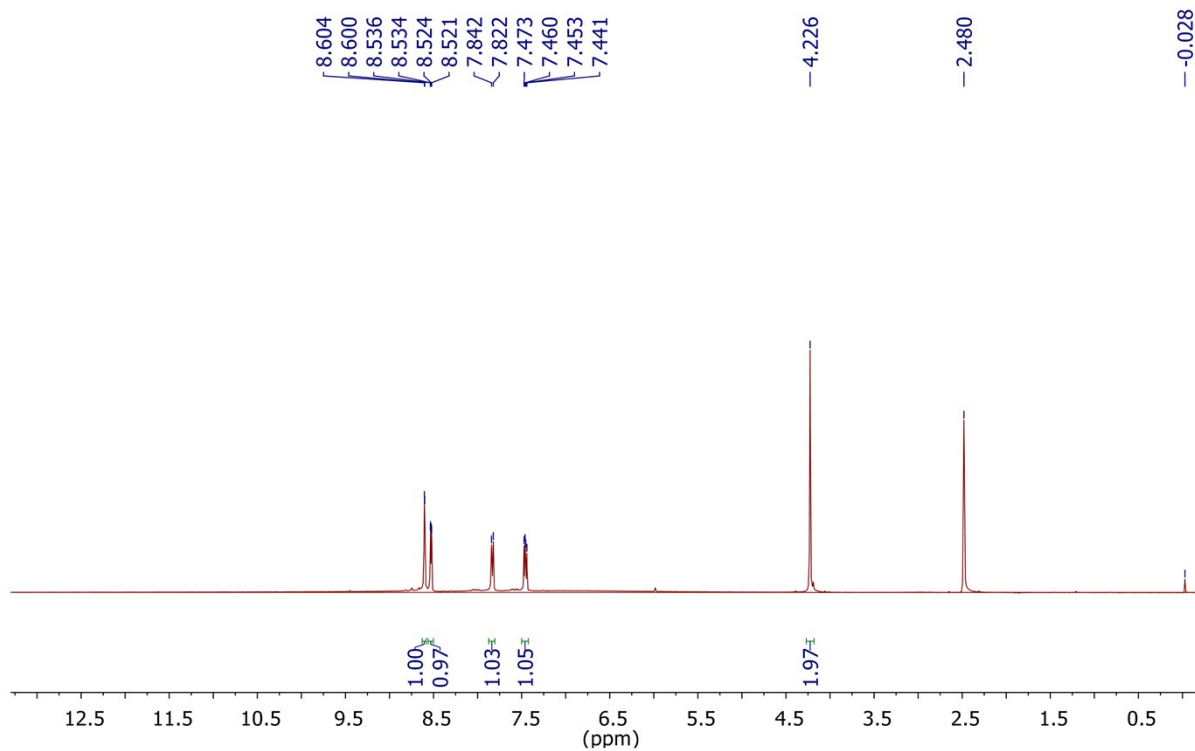

Figure S5.  $^1\text{H}$  NMR spectrum ( $\text{DMSO-}d_6$ , 298 K, 400 MHz) of the  $\text{H}_3\text{mPyMIDC}$  ligand

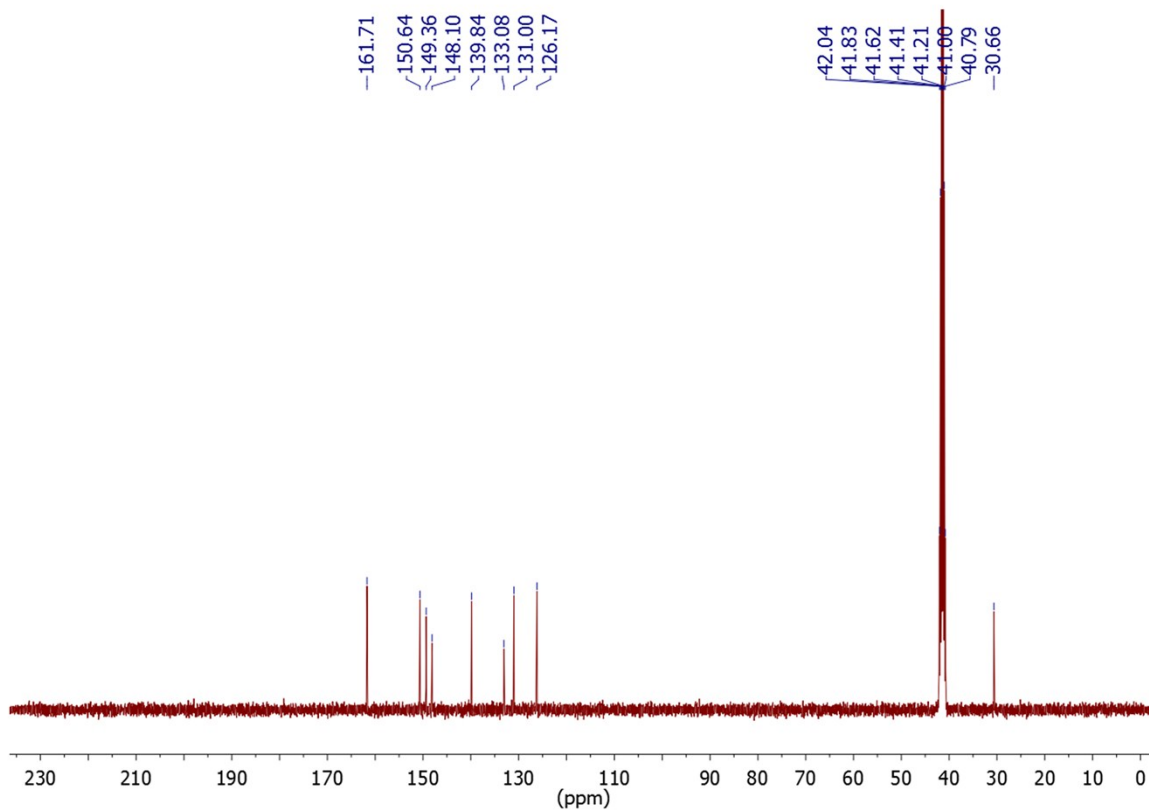

Figure S6.  $^{13}\text{C}$  NMR spectrum ( $\text{DMSO-}d_6$ , 298 K, 400 MHz) of the  $\text{H}_3\text{mPyMIDC}$  ligand

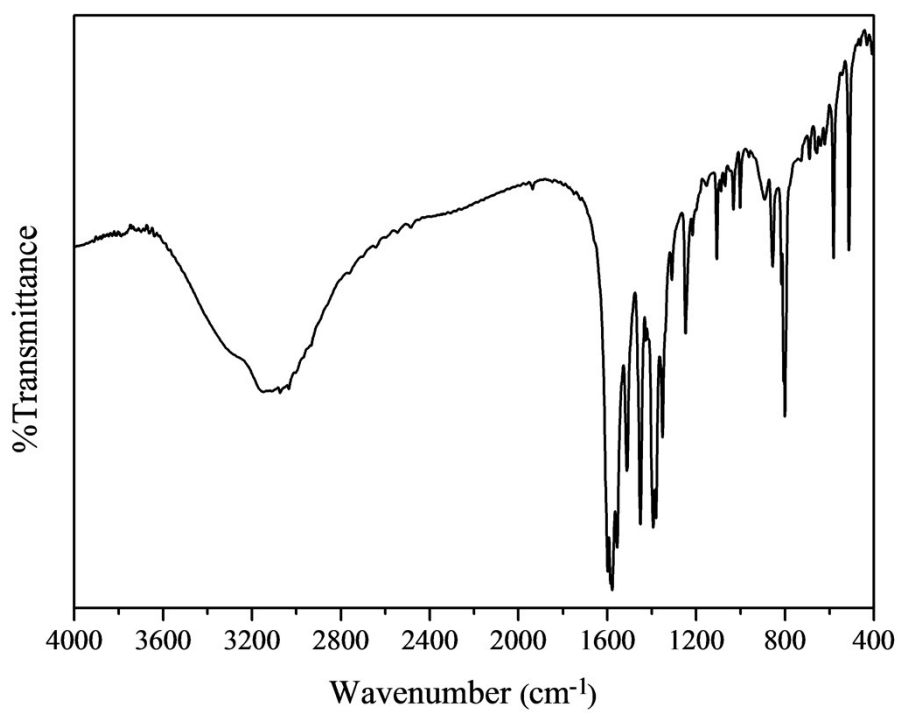

Figure S7. FT-IR spectrum of compound 1.

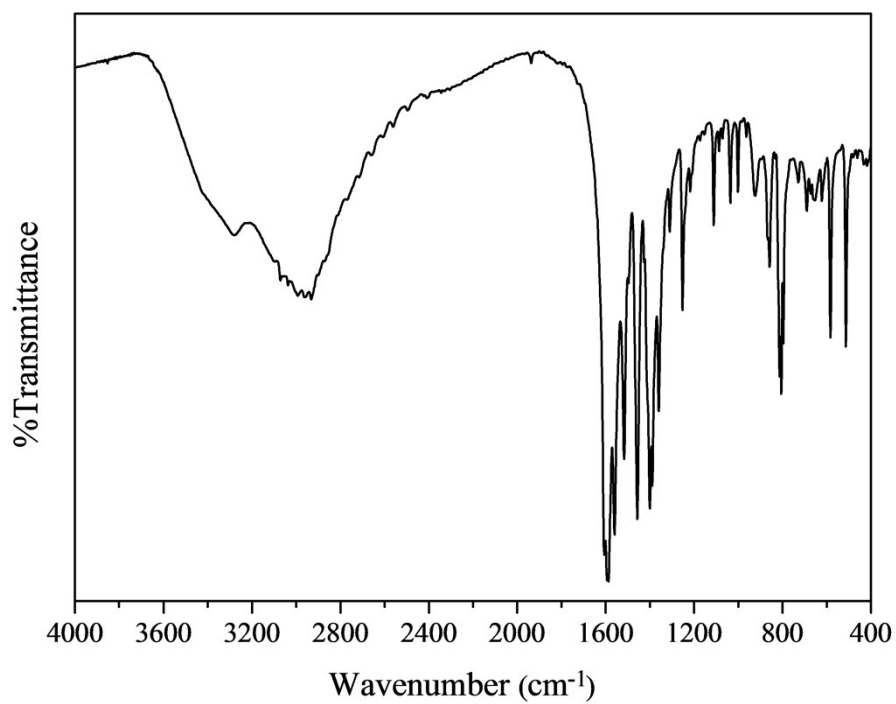

Figure S8. FT-IR spectrum of compound 2.

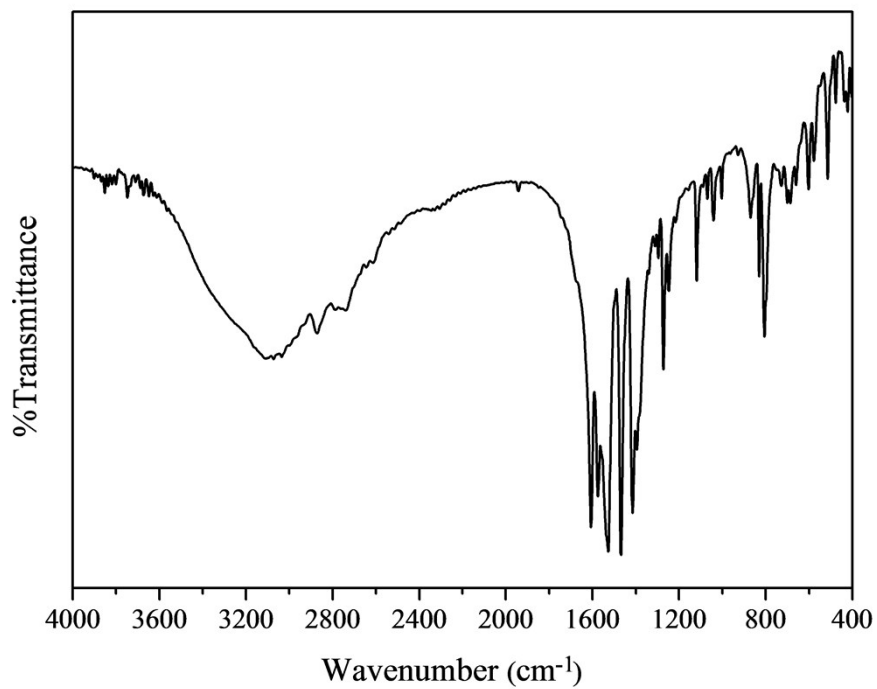

Figure S9. FT-IR spectrum of compound 3.

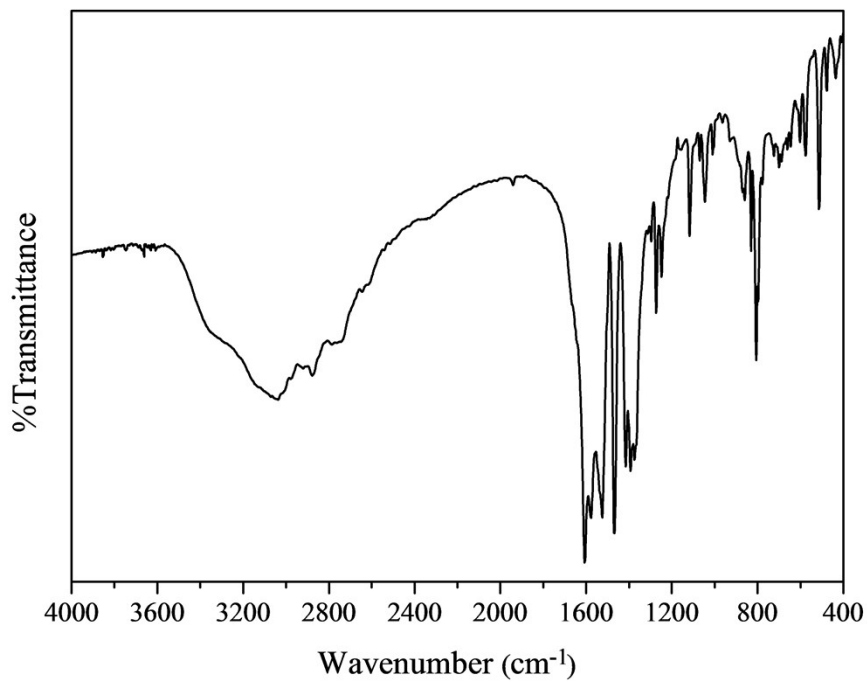

Figure S10. FT-IR spectrum of compound 4.

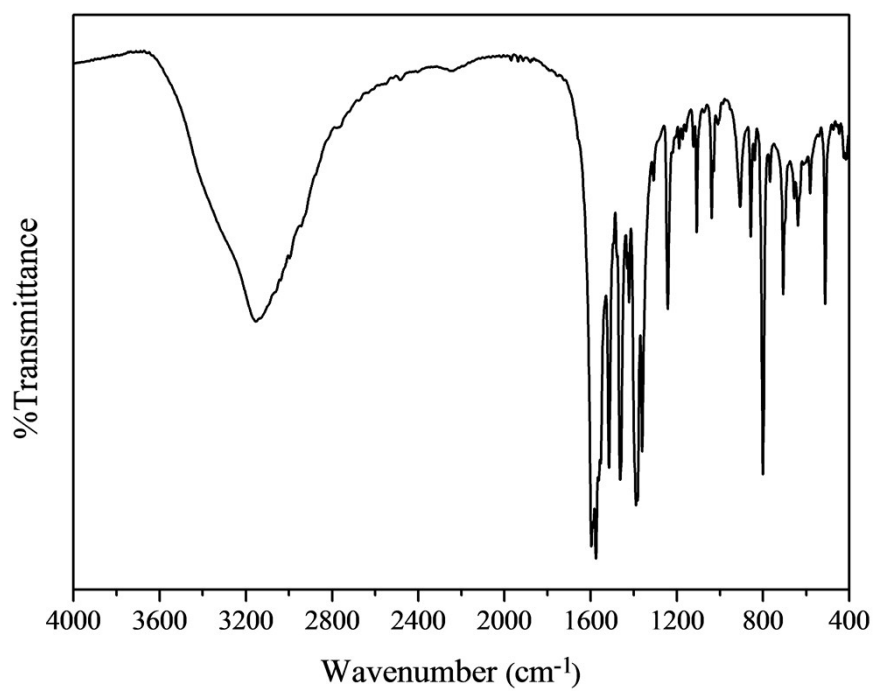

Figure S11. FT-IR spectrum of compound 5.

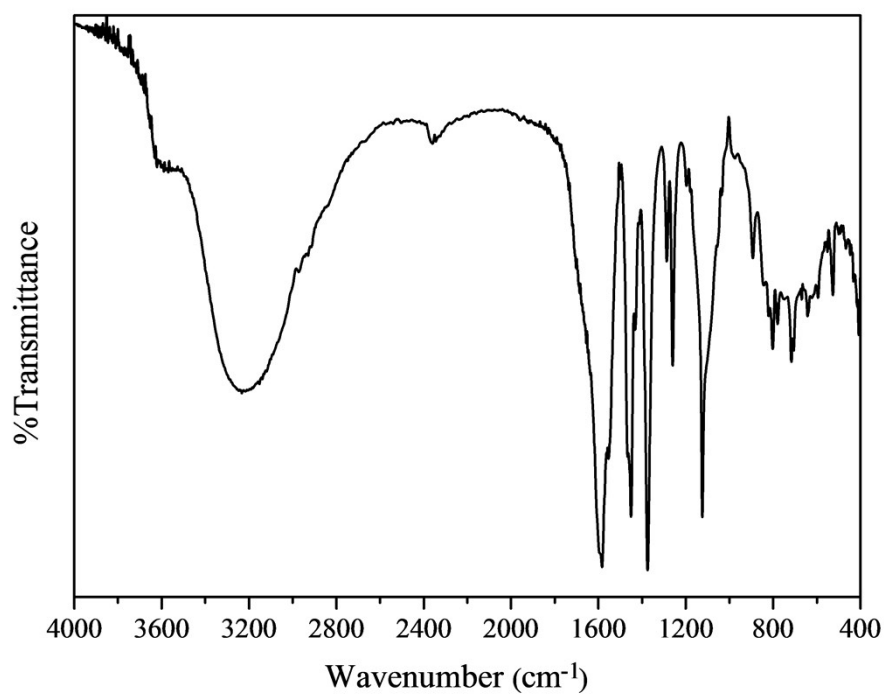

Figure S12. FT-IR spectrum of compound 6.

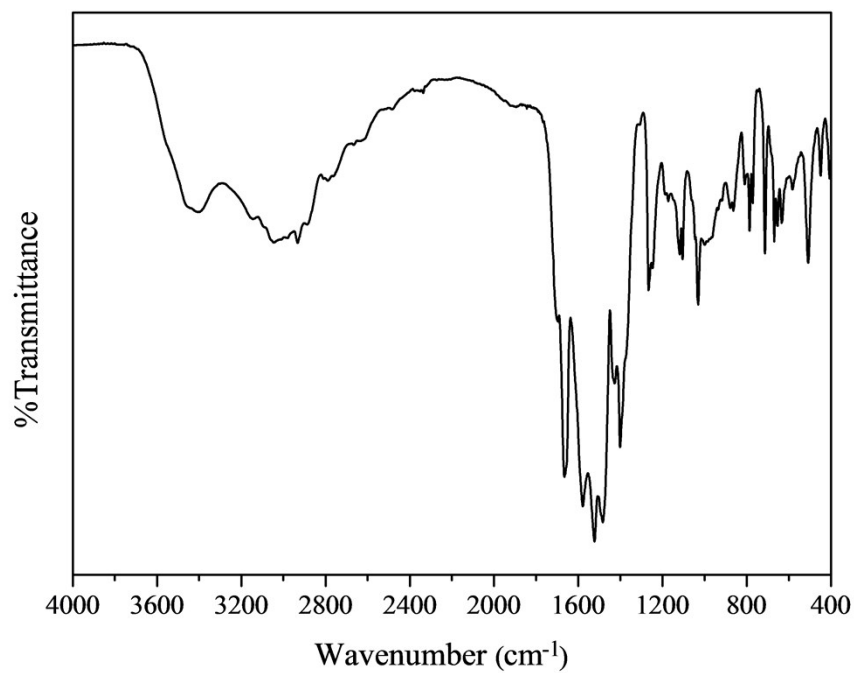

Figure S13. FT-IR spectrum of compound 7.

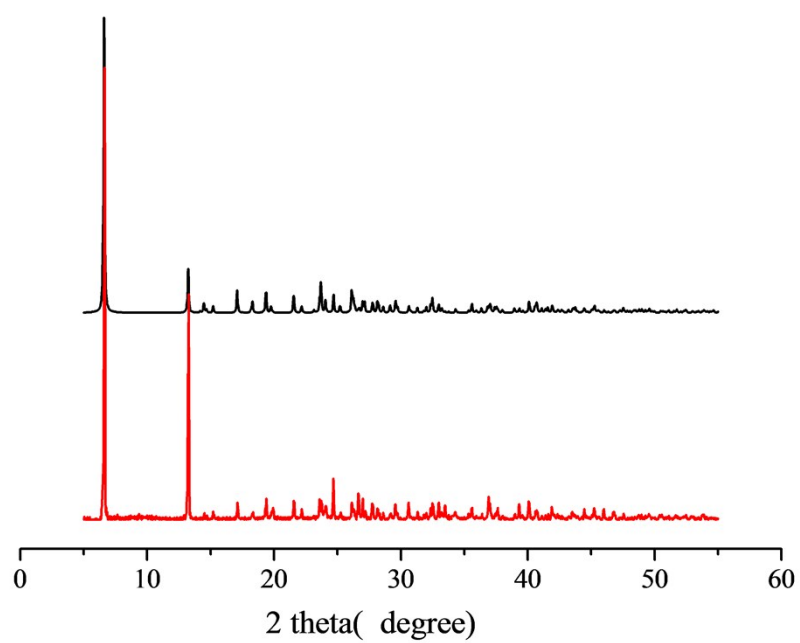

Figure S14 The simulated X-ray powder diffraction patterns (black) and the experimental one (red) of compound 1.

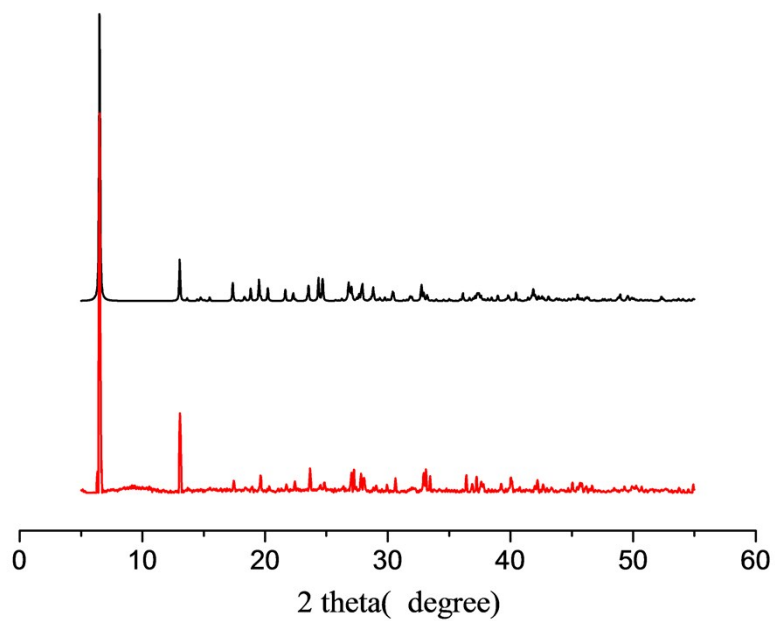

Figure S15 The simulated X-ray powder diffraction patterns (black) and the experimental one (red) of compound **2**.

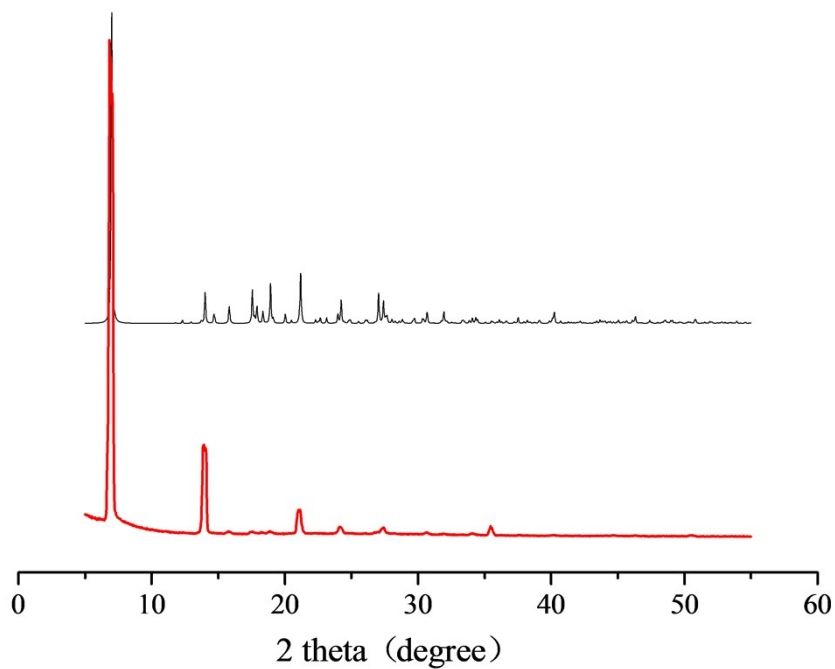

Figure S16 The simulated X-ray powder diffraction patterns (black) and the experimental one (red) of compound **3**.

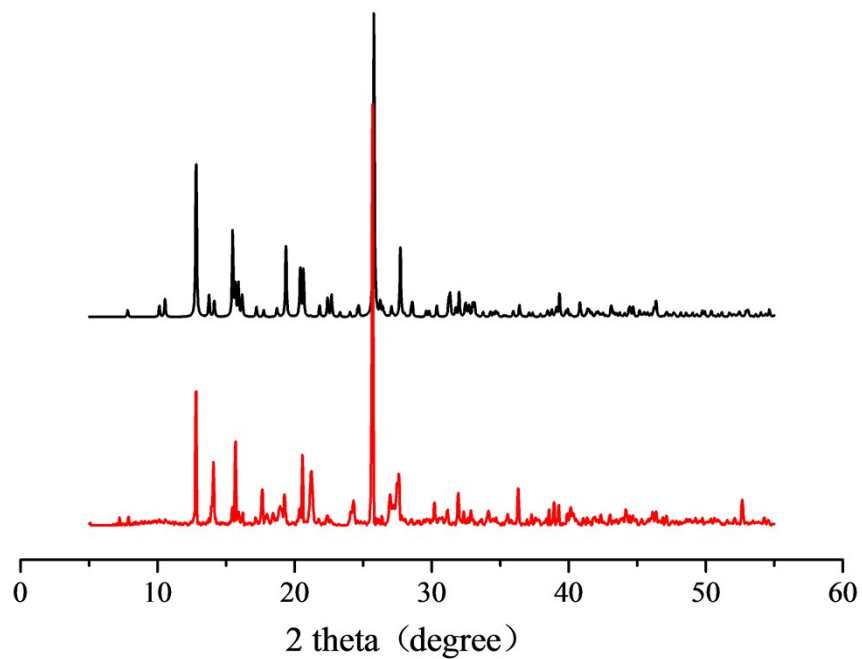

Figure S17 The simulated X-ray powder diffraction patterns (black) and the experimental one (red) of compound 4.

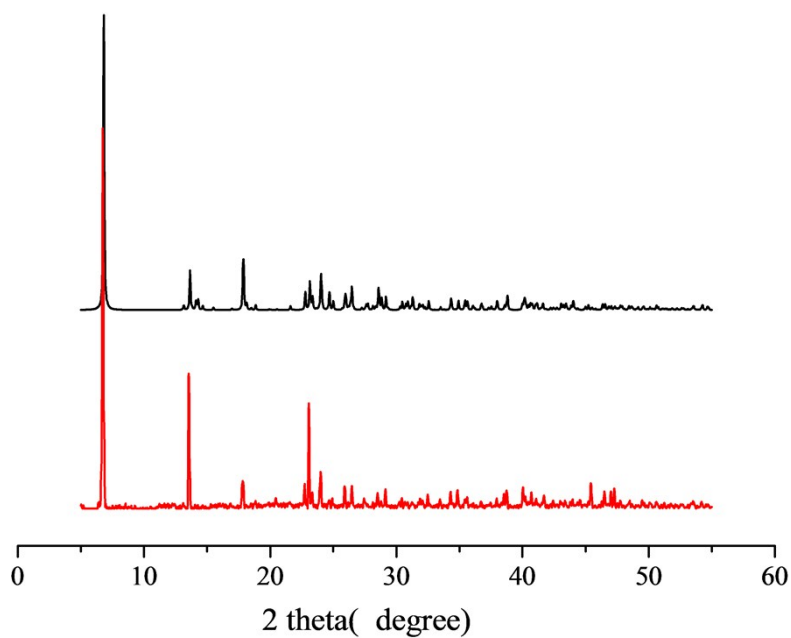

Figure S18 The simulated X-ray powder diffraction patterns (black) and the experimental one (red) of compound 5.

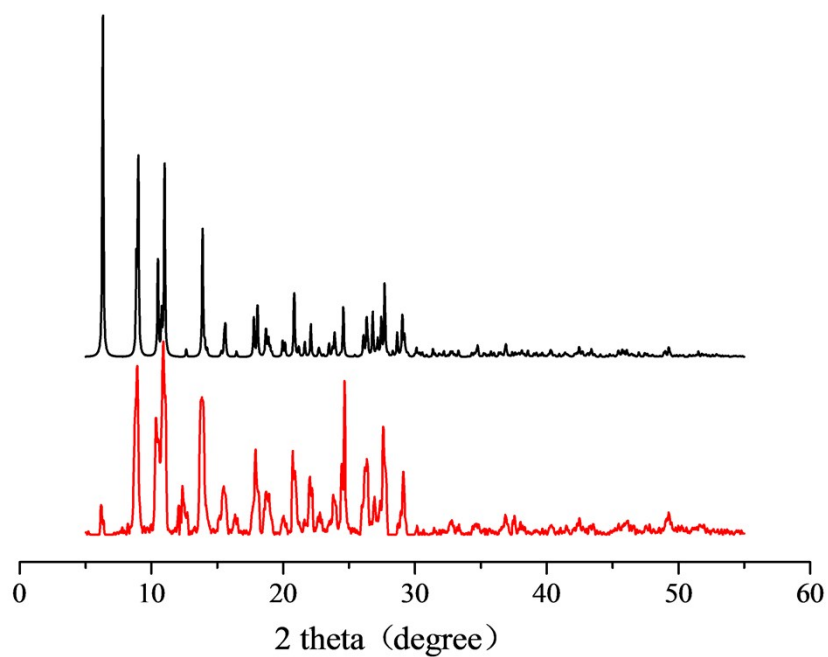

Figure S19 The simulated X-ray powder diffraction patterns (black) and the experimental one (red) of compound 6.

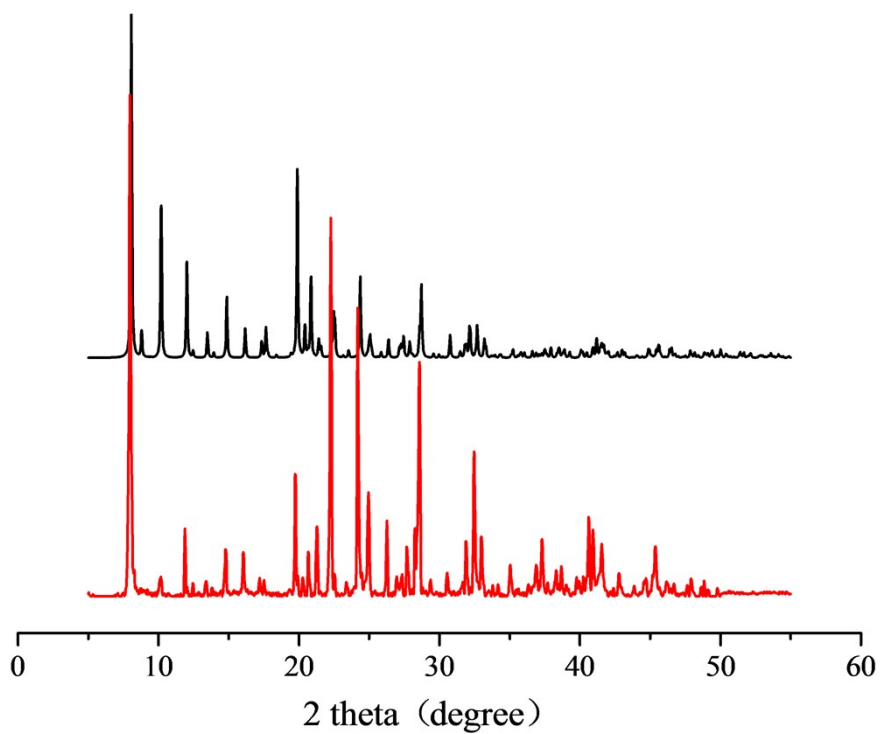

Figure S20 The simulated X-ray powder diffraction patterns (black) and the experimental one (red) of compound 7.



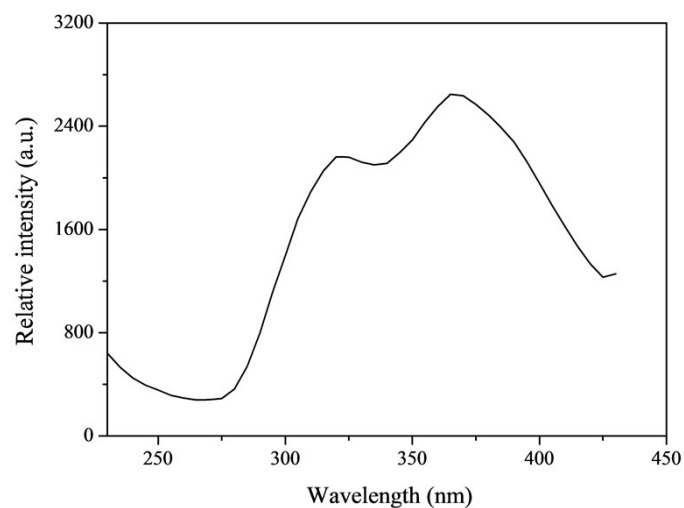

Figure S21 Excitation spectrum of compound **1** in the solid state at room temperature.

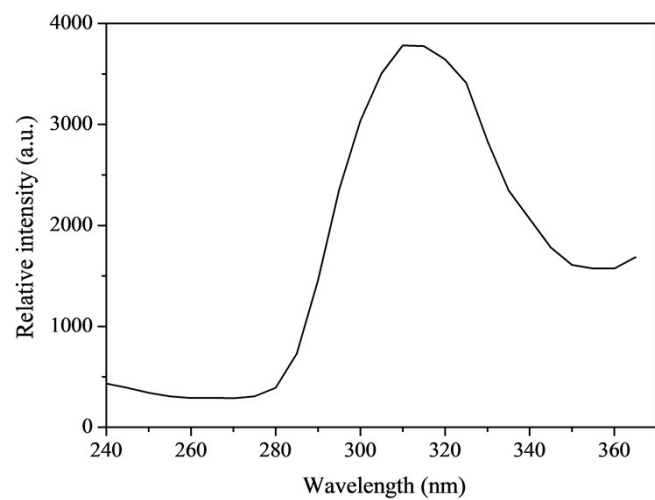

Figure S22 Excitation spectrum of compound **2** in the solid state at room temperature.

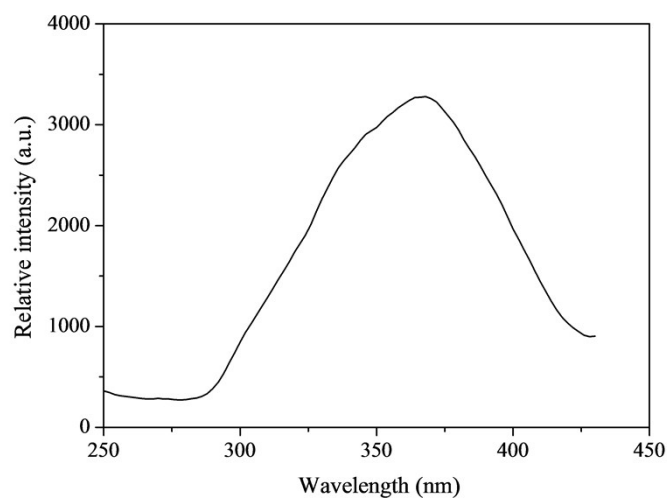

Figure S23 Excitation spectrum of compound **3** in the solid state at room temperature.

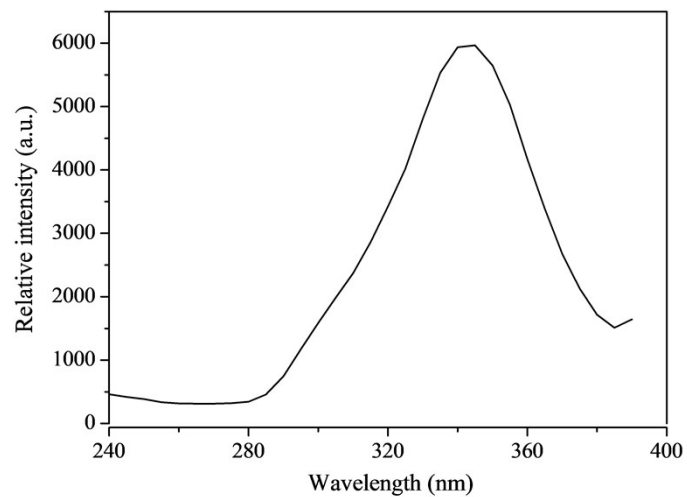

Figure S24 Excitation spectrum of compound **4** in the solid state at room temperature.

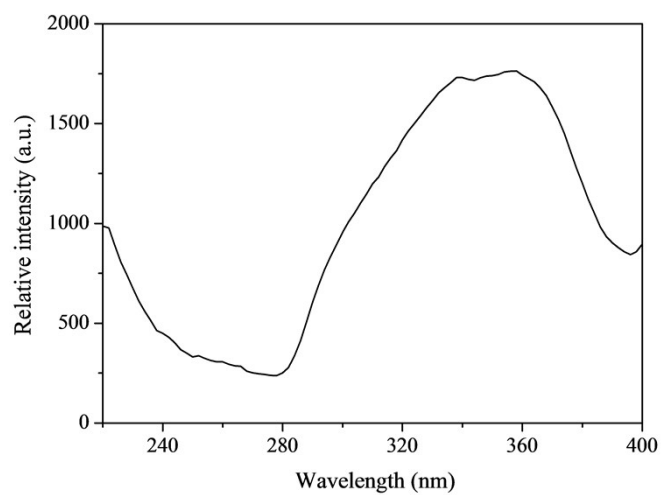

Figure S25 Excitation spectrum of compound **5** in the solid state at room temperature.

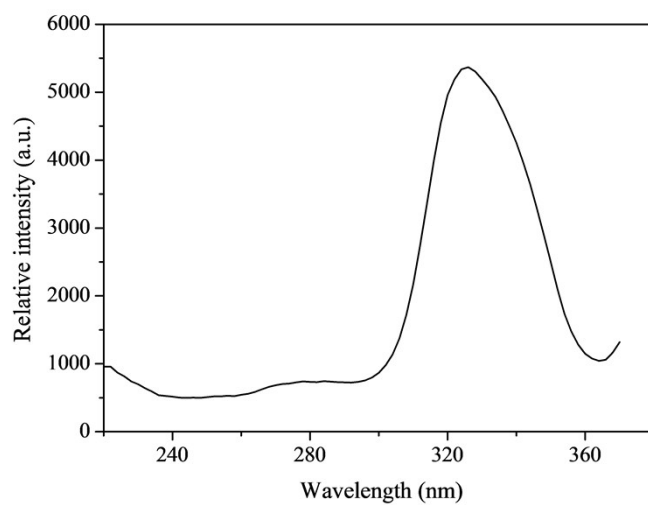

Figure S26 Excitation spectrum of compound **6** in the solid state at room temperature.

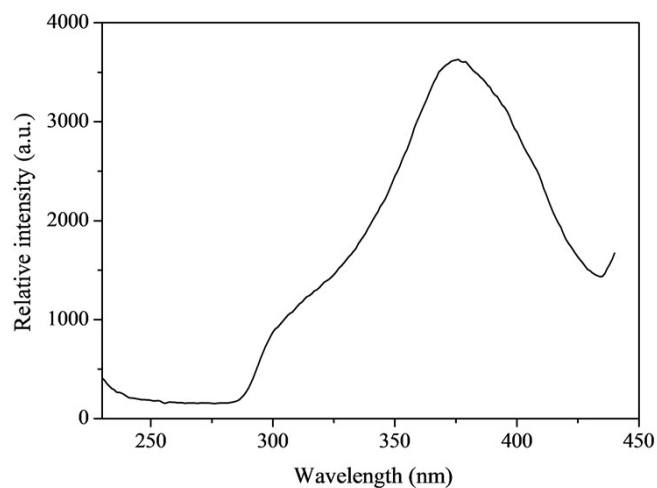

Figure S27 Excitation spectrum of compound **7** in the solid state at room temperature.

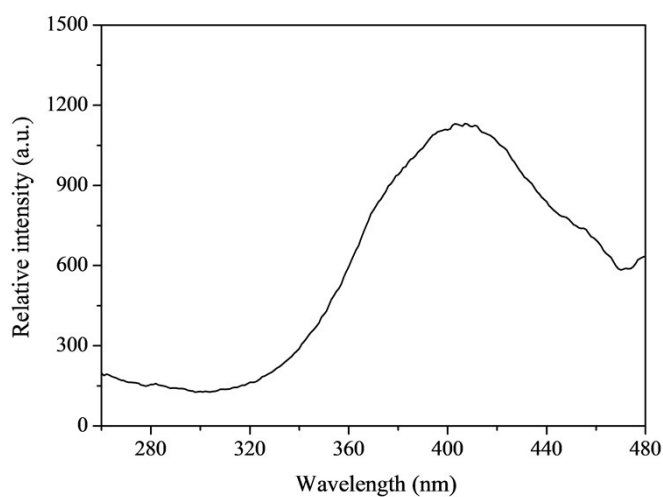

Figure S28 Excitation spectrum of free ligand H<sub>3</sub>pPyMIDC in the solid state at room temperature.

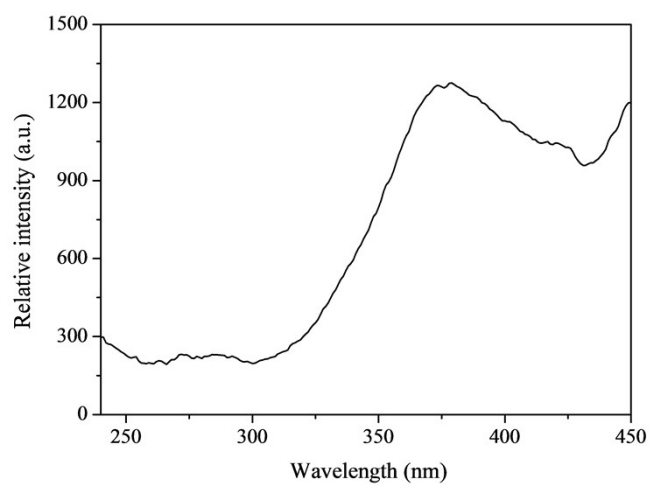

Figure S29 Excitation spectrum of free ligand H<sub>3</sub>mPyMIDC in the solid state at room temperature.
